1 **Legume plant defenses and nutrients mediate indirect interactions between soil rhizobia and**  
2 **chewing herbivores**

3

4 Saumik Basu<sup>1\*</sup>, Benjamin W Lee<sup>1</sup>, Robert E Clark<sup>1</sup>, Sayanta Bera<sup>2,3</sup>, Clare L Casteel<sup>2</sup>, and David  
5 W. Crowder<sup>1</sup>

6 <sup>1</sup> Department of Entomology, Washington State University, Pullman, WA, USA, 99164

7 <sup>2</sup> School of Integrative Plant Science, Plant Pathology and Plant-Microbe Biology Section, Cornell  
8 University, Ithaca, NY, USA, 14850

9 <sup>3</sup> Present address: Department of Cell Biology and Molecular Genetics, University of Maryland  
10 College Park, College Park, MD 20742, USA; sbera@umd.edu

11 \* Corresponding author

12 [saumik.basu@wsu.edu](mailto:saumik.basu@wsu.edu)

13

14

15 **Abstract**

16 Soil bacteria that form mutualisms with plants, such as rhizobia, affects susceptibility of plants to  
17 herbivores and pathogens. Soil rhizobia also promote nitrogen fixation, which mediates host  
18 nutrient levels and defenses. However, whether aboveground herbivores affect the function of soil  
19 rhizobia remains poorly understood. We assessed reciprocal interactions between *Sitona lineatus*,  
20 a chewing herbivore, and pea (*Pisum sativum*) plants grown with or without rhizobia (*Rhizobium*  
21 *leguminosarum* biovar *viciae*). We also examined the underlying plant-defense and nutritional  
22 mechanisms of these interactions. In our experiments, soil rhizobia influenced feeding and  
23 herbivory by chewing herbivores. Leaf defoliation by *S. lineatus* was lower on plants treated with  
24 rhizobia, but these insects had similar amino acid levels compared to those on un-inoculated plants.  
25 Plants grown with soil rhizobia had increased expression of gene transcripts associated with  
26 phytohormone-mediated defense, which may explain decreased susceptibility to *S. lineatus*.  
27 Rhizobia also induced expression of gene transcripts associated with physical and antioxidant-  
28 related defense pathways in *P. sativum*. Conversely, *S. lineatus* feeding reduced the number of  
29 root nodules and nodule biomass, suggesting a disruption of the symbiosis between plants and  
30 rhizobia. Our study shows that aboveground herbivores can engage in mutually antagonistic  
31 interactions with soil microbes mediated through a multitude of plant-mediated pathways.

32

33 **Keywords:** pea leaf weevil, defense genes, phytohormones, physical defense, plant nutrients

34

## 35 **Introduction**

36       Soil harbors abundant and diverse microbe communities that affect ecosystem functions like  
37 biomass production, carbon sequestration, pollution mitigation, and nutrient cycling (A’Bear,  
38 Johnson & Jones, 2014; Bardgett & van der Putten, 2014). Plant-root associated soil bacteria such  
39 as rhizobia can also affect plant susceptibility to herbivores and pathogens by altering plant  
40 nutrient levels or physical and chemical defenses (Dean, Mescher & De Moraes, 2014; Rashid &  
41 Chung, 2017; Heinen, Biere, Harvey & Bezemer, 2018; Blundell et al., 2020). By affecting plant  
42 traits, soil microbes often may indirectly alter interactions between plants, herbivores, and plant  
43 pathogens, and integrating aboveground and belowground interactions is a key priority in food  
44 web ecology (Hooper et al., 2005; Pangesti, Pineda, Pieterse, Dicke & Van Loon, 2013; van Geem  
45 et al., 2013; de Vries & Wallenstein, 2017; Ramirez et al., 2018).

46       Soil microbes have cascading bottom-up impacts on aboveground organisms by altering  
47 plant traits (Pineda, Soler, Pozo, Rasmann & Turlings, 2015; Tao, Hunter & de Roode, 2017;  
48 Valencia et al., 2018). For example, legume plants grown in soil inoculated with rhizobia have  
49 greater biomass than plants grown without rhizobia as well as greater systemic resistance against  
50 herbivores and pathogens (Gopalakrishnan et al., 2015). Soil rhizobia may also indirectly affect  
51 herbivores and pathogens by altering plant defense signaling, release of volatile organic  
52 compounds, and plant nutrients (Rasmann, Bennett, Biere, Karley & Guerrieri, 2017; Tao et al.,  
53 2017; Heinen et al., 2018). Similarly, aboveground pathogens and herbivores may often disrupt  
54 plant-microbe mutualisms, resulting in reduced biological nitrogen fixation and weakened plant  
55 defense (Heath & Lau, 2011; Ballhorn, Younginger & Kautz, 2014; Simonsen & Stinchcombe,  
56 2014). These studies suggest reciprocal interactions between microbes, herbivores, and pathogens  
57 may often be mediated *via* plant-mediated interactions. Yet, few studies have extensively

58 characterized the mechanistic chemical, physical, and nutritional properties of plants and how they  
59 may mediate interactions between aboveground and belowground organisms.

60 Direct herbivore-soil microbe interactions may also occur when herbivores spend part of  
61 their life belowground. For example, *Sitona lineatus* (pea leaf weevil) larvae consume nodules of  
62 legume roots that harbor rhizobia. However, the majority of interactions between soil microbes  
63 and aboveground organisms are likely to be indirect and plant-mediated. For example, rhizobia-  
64 inoculated legumes are often less susceptible to herbivory, as physical defenses such as greater  
65 callose deposition and induction of antioxidants are promoted in these rhizobia-inoculated plants  
66 (Millet et al., 2010; Cawoy et al., 2014; Rashid, Khan, Hossain & Chung, 2017). On the other  
67 hand, herbivory may interfere with legume-rhizobia symbiosis, reducing the number and size of  
68 root nodules, if aboveground herbivores decrease photosynthesis and plant vigor (Simonsen &  
69 Stinchcombe, 2014; Heath & Lau, 2011). By limiting nodule growth and rhizobia function,  
70 herbivores might benefit by interfering with anti-herbivore defense signaling induced by rhizobia  
71 (Pineda, Zheng, van Loon, Pieterse & Dicke, 2010; Shikano, Rosa, Tan & Felton, 2017; Heinen et  
72 al., 2018).

73 Here we addressed the mechanisms driving trait-mediated indirect interactions between a  
74 legume host (*Pisum sativum*, pea), soil rhizobia (*Rhizobium leguminosarum* biovar. *viciae*), and a  
75 chewing herbivore (*S. lineatus*). In the Palouse region of northern Idaho and eastern Washington,  
76 USA, these organisms commonly co-occur in natural and managed ecosystems. However, it is  
77 largely unknown if *S. lineatus* herbivores are affected by the presence of rhizobia in soil, or  
78 whether herbivory from *S. lineatus* affects symbioses between rhizobia and pea plants. We used  
79 greenhouse experiments to assess whether *S. lineatus* affected soil rhizobia and how soil rhizobia  
80 affected plant susceptibility to *S. lineatus*. These experiments were complemented with molecular

81 assays that examined chemical, physical, and antioxidant defense signaling and nutritional  
82 properties of *P. sativum* hosts exposed to *S. lineatus* and inoculated with *Rhizobium*.

83

## 84 **Materials and Methods**

### 85 *Study system and experimental conditions*

86 Many native and cultivated legumes, including *P. sativum*, are found in Palouse region of  
87 eastern Washington and northern Idaho, USA (Clement, Husebye & Eigenbrode, 2010; Chisholm,  
88 Eigenbrode, Clark, Basu & Crowder, 2019). These plants are attacked by insect vectors, pathogens,  
89 and chewing herbivores such as *S. lineatus* (Chisholm et al., 2019; Basu, Clark, Bera, Casteel &  
90 Crowder, 2021b). *Sitona lineatus* adults overwinter outside of *P. sativum* fields and migrate into  
91 fields in the late spring to lay eggs (Carcamo et al., 2018). After eggs hatch, larvae burrow into the  
92 soil to feed and pupate before adults re-emerge in the summer (Carcamo et al., 2018). Thus, *S.*  
93 *lineatus* populations attack *P. sativum* hosts above- and belowground for several months. While *S.*  
94 *lineatus* larvae feed on legume roots belowground, directly affecting the abundance of rhizobia,  
95 we focused on adults feeding aboveground to isolate plant-mediated mechanisms by which  
96 rhizobia affected this herbivore (Mutch & Yang, 2004).

97 Adult *S. lineatus* were collected from *P. sativum* fields one wk before experiments, and soil  
98 was collected from the Palouse Conservation Farm (Pullman, WA, USA) before being exposed to  
99 treatments. For rhizobia treatments, soil was inoculated with pea-specific rhizobia (*Rhizobium*  
100 *leguminosarum* biovar. *viciae*) by mixing N-Dure<sup>R</sup>, a peat-based inoculant with *P. sativum* seeds  
101 using the manufacturer's protocol (Verdasian Life Sciences, Cary, NC, USA). All experiments  
102 were conducted in greenhouses at Washington State University (Pullman, WA, USA) with a 16:8  
103 h light:dark cycle, 21-24°C during light cycles, and 16-18°C during dark cycles.

104

### 105 ***Effects of rhizobia on S. lineatus feeding***

106 We assessed effects of rhizobia on *S. lineatus* feeding with three soil treatments: (i) control  
107 (no treatment); (ii) autoclaved to remove microbes; and (iii) autoclaved with rhizobia added. In  
108 autoclaved treatments, field-collected soil was placed in 61 × 91 cm bags in a steam autoclave at  
109 7 psi and 111°C overnight. As autoclaving soil affects soil moisture, all soil treatments were  
110 standardized to 75% moisture before plants were added.

111 Plants were grown in potting mix (Sunshine® LC1) before transplantation into treated soil  
112 at 2 wk old. Plants were then individually placed in 1 L pots with soil exposed to one treatment,  
113 which were placed in bucket cages (0.6 × 0.3 × 0.3m) for an additional 2 wk before *S. lineatus*  
114 treatments were applied. There were two *S. lineatus* treatments: (i) none (control) and (ii) two adult  
115 *S. lineatus* feeding on plants for 48 h. After 48 h, both adult *S. lineatus* were removed from each  
116 plant to prevent further feeding. The experiment was a 3 × 2 factorial design, with 3 soil treatments  
117 and 2 *S. lineatus* treatments; each treatment was replicated 10 times per block, and two temporal  
118 blocks were performed. There were a total of 120 experimental units (2 blocks × 3 soil treatments  
119 × 2 *S. lineatus* treatments × 10 replicates). In each replicate, the total numbers of leaf notches were  
120 counted by visually observing the aboveground portion of all the plants. Leaf notches is a reliable  
121 indicator of the amount of *S. lineatus* feeding (Chisholm, Sertsuvalkul, Casteel & Crowder, 2018).

122

### 123 ***Analyses of amino acids***

124 We measured amino acid content of *S. lineatus* adults from the different treatments to assess  
125 herbivore nutrient acquisition. Two adult *S. lineatus* were collected from each replicate of the  
126 feeding experiment (4 replicates per each soil treatment) into liquid N<sub>2</sub> and lyophilized. After

127 lyophilization, *S. lineatus* tissue was weighed and extracted with 20mM of HCL (Patton, Bak,  
128 Sayre, Heck & Casteel, 2019). Amino acids were derivatized using AccQ-Fluor reagent kits  
129 (Waters, Milford, MA, USA), with L-Norleucine as an internal standard. 10 µl from each sample  
130 were injected into a Agilent 1260 Infinity HPLC (Agilent, Santa Clara, CA, USA) with a Nova-  
131 Pak C18 column (c).

132 Amino acid derivatives were detected with excitation and emission wavelengths of 250 nm  
133 and 395 nm, respectively. Peak areas were compared to a standard curve made from a serial  
134 dilution of amino acid standards (Sigma-Aldrich, St. Louis, MO). Solvent A, AccQ-Tag Eluent A,  
135 was premixed from water; Solvent B was acetonitrile:water (60:40). The gradient used was 0–  
136 0.01 min, 100% A; 0.01–0.5 min, linear gradient to 3% B; 0.5–12 min, linear gradient to 5% B;  
137 12–15 min, linear gradient to 8% B; 15–45 min, 35% B; 45–49 min, linear gradient to 35% B; 50–  
138 60 min, 100% B. The flow rate was 1.0 ml min<sup>-1</sup>. Amino acid derivatives and peak areas were  
139 measured with an Agilent fluorescence detector and ChemStation software. To calculate  
140 concentrations, standard curves were created for each amino acid using dilutions of standards.

141

#### 142 ***Effects of S. lineatus on soil rhizobia***

143 We next assessed how *S. lineatus* feeding affected nodulation and nodule biomass, two key  
144 metrics of rhizobia function, with two treatments: (i) control - no *S. lineatus* and (ii) *S. lineatus*  
145 feeding. In *S. lineatus* treatments, we released two adults for 48 h on 2 wk old *P. sativum* plants,  
146 after which the adults were removed. Following treatments, plants were uprooted from the soil  
147 after 7 d and soil was washed off roots with tap water. Nodules were counted from the root of each  
148 plant and then excised. Nodule fresh weights were taken immediately after collection, then dried

149 for 5 d at 37°C before dry weight measurements were taken. Plants that failed to develop any root  
150 nodules served as a control for this experiment (no rhizobia inoculation).

151

### 152 *Analyses of transcripts related to defense signaling*

153 We next conducted an experiment with two *S. lineatus* treatments: (i) control, no *S. lineatus*  
154 and (ii) two adult *S. lineatus* feeding for 48 h. These treatments were crossed with two rhizobia  
155 treatments: (i) control, no rhizobia inoculum and (ii) seeds treated with rhizobia. For preparation  
156 of potting mix, soil and sand were mixed in equal volume (1:1) to facilitate nodule development;  
157 plants were in treated soil for 2 wk before *S. lineatus* treatments. Plant tissue samples were  
158 harvested 3 d and 7 d after *S. lineatus* addition. In total, the experiment included four randomly  
159 assigned replicates of each treatment for two temporal blocks in a  $2 \times 2 \times 2$  factorial design (2 soil  
160 treatments  $\times$  2 *S. lineatus* treatments  $\times$  2 time points  $\times$  4 replicates = 32 total experimental units).  
161 Aboveground harvested plant tissue was wrapped in aluminum foil, frozen in liquid N<sub>2</sub>, and kept  
162 on dry ice before storing in -80 °C. Samples were ground using a mortar and pestle in liquid N<sub>2</sub>,  
163 and 50 to 100 mg of tissue was used for total RNA extraction using Promega SV total RNA  
164 isolation kits (Promega, Madison, WI) and cDNA from 1 µg of total RNA using Bio-Rad iScript  
165 cDNA synthesis kits. Gene-specific primers (Table S1) were used in qRT-PCR reactions (10 µl)  
166 containing 3 µl of ddH<sub>2</sub>O, 5 µl of iTaq Univer SYBR Green Supermix, 1 µl of primer mix (forward  
167 and reverse), and 1 µl of diluted (1:25) cDNA template. The qRT-PCR program had an initial  
168 denaturation for 3 min at 95 °C followed by 40 cycles of denaturation at 95 °C for 15 s, annealing  
169 for 30 s at 60 °C, and extension for 30 s at 72 °C. For melting curve analysis, a dissociation step  
170 cycle was used (55 °C for 10 s, and then 0.5 °C for 10 s until 95 °C). The relative expression of



171 genes were calculated using the delta-delta Ct method, ( $2^{-\Delta\Delta Ct}$ ) with Ps $\beta$ -tubulin as a housekeeping  
172 gene (Livak & Schmittgen, 2001; Kozera & Rapacz, 2013).

173 Harvested plant tissue was assessed for expression of 14 gene transcripts associated with  
174 hormone signaling, physical, or antioxidant-related defense pathways (Fondevilla, Küster,  
175 Krajinski, Cubero & Rubiales, 2011; Tran, You & Barbetti, 2018; Kimura & Kawano, 2015). Gene  
176 sequences were obtained using accession numbers of available pea genes or by using the pea  
177 marker database (Kulaeva et al., 2017) and blast searching the reference pea genome (Kreplak et  
178 al., 2019). We assessed expression of 7 gene transcripts related to phytohormones. *Pathogenesis-*  
179 *related protein 1 (PRI)* and *Isochorismate synthase1 (ICS1)* are associated with the salicylic acid  
180 (SA) pathway, with *ICS1* involved upstream of SA biosynthesis and *PRI* triggering downstream  
181 systemic acquired defenses (Zhang et al., 2010; Fondevilla et al., 2011; Seguel et al., 2018). Two  
182 genes, *Lipoxygenase 2 (LOX2)* and *12-oxophytodienoate reductases 3 (OPR3)* are associated  
183 upstream and downstream, respectively, of jasmonic acid biosynthesis (He, Fukushige, Hildebrand  
184 & Gan, 2002; Fondevilla et al., 2011; Wasternack & Hause, 2013). Other genes included were *l-*  
185 *aminocyclopropane-1-carboxylic acid synthases 2 (ACS2)*, which is associated with ethylene  
186 biosynthesis, and *Aldehyde oxidase 3 (AO3)*, which catalyzes abscisic acid biosynthesis. Beside  
187 abscisic acid biosynthesis, *AO3* also affects production of reactive oxygen species (Yergaliyev et  
188 al., 2016).

189 We assessed relative transcript accumulation of two additional genes related to physical  
190 defense: (i) viz.  *$\beta$ -1,3 Glucanase*, an enzyme that regulates callose production and (ii) *calcium-*  
191 *regulated/ATP-independent ferisome protein gene*, which is associated with P protein plugs that  
192 seal phloem pathways (Zavaliev, Ueki, Epel & Citovsky, 2011; Srivastava, Tuteja & Tuteja, 2015;  
193 Moravčíková et al., 2016). Six additional genes for antioxidant related defense pathways were

194 assessed: 3 *Super Oxide Dismutases* (*FeSOD*, *CuZnSOD*, *MnSOD*), *Catalase* and *Glutathione*  
195 *reductase 1(GRI)*, and *Peroxidase (PsPOX11)* (Fondevilla et al., 2011; Tran et al., 2018).  
196 Induction of these defense pathways can catalyze superoxides (reactive oxygen species, ROS) in  
197 plants (Kimura & Kawano, 2015) and affect induction of salicylic acid in peas (Kawahara et al.,  
198 2006).

199

## 200 ***Data analysis***

201 Analyses were conducted in R 4.0.5 (R Core Team 2021). We used a generalized linear  
202 model (GLM) with a Poisson distribution to assess whether soil treatments (control, autoclaved,  
203 rhizobia) affected the number of *S. lineatus* feeding notches; negative controls without *S. lineatus*  
204 never had feeding damage, and these treatments were not included. We also used GLMs with a  
205 Poisson distribution to assess if *S. lineatus* (present or absent) affected plant nodule weight and  
206 nodule biomass. We analyzed effects of soil rhizobia and *S. lineatus* treatments, and their  
207 interaction, on fold change gene expression using MANOVA (multiple analysis of variance) on  
208 delta CT values ( $2^{-\Delta\Delta CT}$  values before transformation) for relative transcript abundance for 14  
209 different genes, *PR1*, *ICS1*, *OPR3*, *LOX2*, *AO3*, *ACS2*,  $\beta$ -1,3 *Glucanase*, *Calcium-regulated/ATP-*  
210 *independent ferisome protein gene*, *CuZnSOD*, *FeSOD*, *MnSOD*, *Catalase*, *GRI* and *PsOX11*.  
211 MANOVA was used as we assumed responses of multiple gene transcripts came from the same  
212 plants and therefore have a partially correlated response to treatment. Parameter estimates and  
213 subsequent calculations for delta-delta CT ( $2^{-\Delta\Delta Ct}$ ) were plotted on the log 10 scale. Finally,  
214 average amino acid content for 13 amino acids was fitted to a linear mixed model (LMM, lme4  
215 package, Bates, Maechler, Bolker & Walker, 2015), with soil treatment as a fixed effect and amino  
216 acid and replicate as random effects; amino acid concentration was log-transformed to meet

217 normality assumptions. Estimated marginal means and all post-hoc tests were assessed using the  
218 emmeans package (Lenth, 2016), with significance tests via analysis of deviance tables generated  
219 using the car package (Fox & Weisberg, 2011).

220

## 221 **Results**

### 222 **Effects of soil rhizobia on *S. lineatus* feeding and amino acid uptake**

223 Rhizobia inoculation altered the amount of herbivory from *S. lineatus* on *P. sativum* hosts  
224 ( $\chi^2 = 106.0$ ,  $P < 0.001$ , Fig. 1). Plants grown in autoclaved soil had the most feeding, while plants  
225 grown in autoclaved soil with rhizobia had the least, with plants grown in control soil having  
226 intermediate levels (Figs. 1, S1). Soil treatment, however, did not significantly affect the  
227 concentration of amino acids in *S. lineatus* from plants ( $\chi^2 = 1.66$ ,  $df = 2$ ,  $P = 0.44$ , Fig. 1B).

228

### 229 **Effects of *S. lineatus* herbivory on soil rhizobia**

230 Herbivory from *S. lineatus* had a negative effect on symbiosis between rhizobia and plant  
231 hosts (Figs. 2, S2). Plants that were fed on by *S. lineatus* had fewer root nodules ( $\chi^2 = 6.49$ ,  $P =$   
232  $0.010$ , Fig. 2A) and lower total nodule biomass ( $\chi^2 = 9.41$ ,  $P = 0.002$ , Fig. 2B) than plants that did  
233 not experience herbivory. However, treatments with *S. lineatus* did not significantly affect nodule  
234 dry mass ( $\chi^2 = 2.46$ ,  $P = 0.12$ , Fig. 2C).

235

### 236 **Effects of *S. lineatus* and soil rhizobia on expression of defense gene transcripts**

237 Plants grown with rhizobia had higher expression of the ethylene biosynthetic gene, *ACS2*,  
238 compared to plants grown in control soil with or without *S. lineatus* (Fig. 3A). The presence of *S.*  
239 *lineatus* affected expression of other gene transcripts when plants were grown with rhizobia. Plants

240 grown with rhizobia and no herbivory had greater expression of two gene transcripts associated  
241 with jasmonic acid, *OPR3* and *LOX2*, and one associated with the final step of abscisic acid  
242 biosynthesis, *AO3*, compared to plants grown with rhizobia but no herbivory (Figs. 3B, D, E).  
243 *Sitona lineatus* increased levels of the salicylic acid-associated gene transcript, *ICS1*, on control  
244 plants compared to plants grown with rhizobia (Fig. 3C). Soil rhizobia also strongly induced  $\beta$ -1,3  
245 *glucanase*, which is associated with callose-mediated defense (Fig. 4A, S3).

246 For the six gene transcripts related to antioxidant-mediated defense, three genes associated  
247 with the superoxidase disumaste (*FeSOD*, *CuZnSOD*, *MnSOD*) had greater expression in plants  
248 grown in rhizobia-inoculated soil compared to control soil (Figs. 5B, C, E, S3). However, other  
249 gene transcripts were not impacted by rhizobia. We found that *S. lineatus* induced the antioxidant  
250 gene transcript, *Catalase*, on plants grown in soil without rhizobia (Figs 5A, S3), and the gene  
251 transcript peroxidase (*PsPOX11*) on plants grown in soil with rhizobia (Figs. 5F, S3).

252

## 253 Discussion

254 Herbivores and soil microbes interact through many direct and indirect, trait-mediated,  
255 pathways. Our study highlights plant-mediated mechanisms that may underlie these interactions.  
256 Root-associated bacteria can alter transcript levels of important anti-herbivore defensive genes in  
257 host plants, which can impact the nutritional quality of plants and nutrient uptake by herbivores.  
258 In turn, these changes led to reduced leaf herbivory on plants. We observed that *P. sativum* host  
259 plants grown in rhizobia-inoculated soil had reduced leaf defoliation from *S. lineatus* compared to  
260 plants grown without rhizobia (either control or autoclaved). However, *S. lineatus* individuals  
261 obtained similar levels of amino acids on plants grown in rhizobia-inoculated and control plants.  
262 This shows weevils obtained more nutrients per unit of leaf area on plants grown in rhizobia-

263 inoculated soil, which may be due to improved nutritional quality of the host plants (Kempel,  
264 Schädler, Chrobock, Fischer & van Kleunen, 2011). Our results raise the intriguing possibility that  
265 mutualistic soil microbes promote plant health by increasing plant nutrients, which in turn reduces  
266 total feeding by herbivores.

267 Our results are in line with studies showing rhizobia and arbuscular mycorrhizal fungi are  
268 keystone microbes that decrease plant susceptibility to insects and pathogens (Jaber & Vidal, 2009;  
269 Pineda et al., 2010; Santos et al., 2014; Yang et al., 2014; Gopalakrishnan et al. 2015; Mabrouk et  
270 al., 2018). Our study provides evidence that several mechanisms may underlie these results. Soil  
271 rhizobia can modify plant nutrients in legumes as well as various defense related signaling  
272 pathways against insects, which can alter insect feeding responses and performance (Dean et al.,  
273 2014). For example, soil rhizobia increase tolerance of soybean plants (*Glycine max*) to soybean  
274 aphid (*Aphis glycine*), although different rhizobia strains vary in their effects (Dean et al., 2014).  
275 Similarly, growth and performance of cotton leaf worm (*Spodoptera littoralis*) is limited by  
276 rhizobia on clover (*Trifolium repens*), as rhizobia increased production of nitrogen-based defense  
277 compounds in hosts (Kempel, Brandl & Schädler, 2009). However, these effects were not observed  
278 on clover plants that were naturally cyanogenic, suggesting benefits of rhizobia may only occur  
279 on plants that are not naturally well defended (Kempel et al., 2009).

280 Rhizobia-induced changes in phytochemical and nutritional traits of plants have increasing  
281 been recognized as important drivers of ecosystem function in multi-trophic food webs (Qchieno  
282 et al., 2021). For example, beneficial root colonizing soil rhizobia often elicit induced systemic  
283 resistance against insects and pathogens through activation of JA and ET signaling (Romera et al.,  
284 2019). Symbiotic association of legume roots by soil rhizobia has been associated with enhanced  
285 resistance against aboveground consumers including beetles (Soundararajan, Chitra, & Geetha,

286 2013; Thamer, Schädler, Bonte & Ballhorn, 2011; Godschalx, Tran, & Ballhorn, 2017).  
287 Conversely, aboveground feeders damage leaves through defoliation and interfere with  
288 photosynthesis by consuming sugars and other nutrients that are required for root nodulation  
289 (Katayama et al., 2014). We observed plants attacked by *S. lineatus* had fewer nodules and lower  
290 nodule biomass than controls, suggesting antagonistic effects of *S. lineatus* on legume-rhizobia  
291 symbiosis. Previous studies have also shown that outbreaks of *S. lineatus* can promote the spread  
292 of aphid-borne viruses that also impede the function of rhizobia (Chisholm et al., 2019; Basu et  
293 al., 2021a); thus, we have shown that *S. lineatus* may negatively affect plant-rhizobia symbiosis  
294 through multiple indirect pathways.

295 Our analysis of phytohormone transcripts suggests interactions between rhizobia and *S.*  
296 *lineatus* were mediated by phytohormones. Rhizobia induced plant defense against *S. lineatus* by  
297 activating jasmonic acid, ethylene, and abscisic acid signaling. Jasmonic acid and ethylene are two  
298 key systemic defense pathways induced in plants against chewing herbivores (Pangesti et al., 2015;  
299 2016; Rashid & Chung, 2017; Zhu et al., 2018). Similarly, beneficial microbes often also stimulate  
300 biosynthesis of abscisic acid (Sgroy et al., 2009; Jha & Subramanian, 2013), even though abscisic  
301 acid signaling can have negative effects on nodulation (Tominaga et al., 2010; Roy Choudhury,  
302 Johns & Pandey, 2019). Our study provides further evidence that rhizobia can affect herbivores by  
303 altering physical defenses such as callose (Ballhorn et al., 2014; Gaudioso-Pedraza et al., 2018)  
304 and antioxidants (Walz, Juenger, Schad & Kehr, 2002, Dumanović, Nepovimova, Natić, Kuča, &  
305 Jaćević, 2021). Antioxidant mediated defenses are found in cellular organelles such as  
306 chloroplasts, mitochondria, and peroxisomes, and we found evidence that these defenses (*MnSOD*,  
307 *FeSOD* and *CuZnSOD*) were impacted positively by rhizobia. These results suggest broad

308 induction of both chemical and physical defense by rhizobia can affect herbivores through trait-  
309 mediated indirect pathways.

310 Overall, our study shows soil rhizobia improve plant health by inducing broad-spectrum  
311 systemic resistance against herbivores while also improving plant quality. On the other hand,  
312 herbivores can interfere strongly with legume-rhizobia symbiosis by inhibiting root nodule  
313 development. Thus, assessing reciprocal interactions between soil rhizobia and herbivores is  
314 crucial for understanding broader dynamics of agricultural and natural food webs. As legumes are  
315 commonly included in rotations with cereals (corn, rice, wheat, barley) in agroecosystems around  
316 the world, understanding how soil microbes (e.g. rhizobia) can be affected by chewing herbivores  
317 could lead to more effective management of biological nitrogen fixation and crop sustainability.  
318 Manipulation of soil microbes, for example, may also provide a novel tactic to manage devastating  
319 herbivores while improving crop yield and nitrogen fixation.

320

### 321 **Author Contributions**

322 S.B<sup>1</sup>. and D.W.C. conceived the ideas and methodology; S.B.<sup>1</sup>, B.W.L., R.E.C., S.B<sup>2</sup>. and C.L.C.  
323 collected the data; B.W.L., S.B.<sup>1</sup>, R.E.C., S.B<sup>2</sup>., C.L.C and D.W.C. analyzed and interpreted the  
324 data; all authors contributed critically to the drafts and gave final approval for publication.

325

### 326 **Acknowledgements**

327 We thank the many undergraduates who helped in various experiments, data collection, and R.  
328 Eposado for assistance with data analysis. This research was supported by USDA-NIFA Grants  
329 2016-67011-24693, 2017-67013-26537, and Hatch project 1014754.

330

## 331 **References**

- 332 A’Bear, A. D., Johnson, S. N., & Jones, T. H. (2014). Putting the ‘upstairs–downstairs’ into  
333 ecosystem service: What can aboveground–belowground ecology tell us? *Biological Control*, 75,  
334 97–107. <https://doi.org/10.1016/j.biocontrol.2013.10.004>
- 335 Ballhorn, D. J., Younginger, B. S., & Kautz, S. (2014). An aboveground pathogen inhibits  
336 belowground rhizobia and arbuscular mycorrhizal fungi in *Phaseolus vulgaris*. *BMC Plant*  
337 *Biology*, 14. <https://doi.org/10.1186/s12870-014-0321-4>
- 338 Bardgett, R. D., & van der Putten, W. H. (2014). Belowground biodiversity and ecosystem  
339 functioning. *Nature*, 515(7528), 505–511. <https://doi.org/10.1038/nature13855>
- 340 Basu, S., Clark, R. E., Bera, S., Casteel, C. L., & Crowder, D. W. (2021b). Responses of pea plants  
341 to multiple antagonists are mediated by order of attack and phytohormone crosstalk. *Molecular*  
342 *Ecology*, 30(19), 4939–4948. <https://doi.org/10.1111/mec.16103>
- 343 Basu, S., Clark, R. E., Blundell, R., Casteel, C. L., Charlton, A. M., & Crowder, D. W. (2021a).  
344 Reciprocal plant-mediated antagonism between a legume plant virus and soil rhizobia. *Functional*  
345 *Ecology*, 35(9), 2045–2055. <https://doi.org/10.1111/1365-2435.13828>
- 346 Bates, D., Maechler, M., Bolker, B., & Walker, S. (2015). Fitting linear mixed-effects models using  
347 lme4. *Journal of Statistical Software*, 67, 1–48. <http://doi.org/10.18637/jss.v067.i01>
- 348 Blundell, R., Schmidt, J. E., Igwe, A., Cheung, A. L., Vannette, R. L., Gaudin, A. C. M., & Casteel,  
349 C. L. (2020). Organic management promotes natural pest control through altered plant resistance  
350 to insects. *Nature Plants*, 6(5), 483–491. <https://doi.org/10.1038/s41477-020-0656-9>
- 351 Cárcamo, H. A., Vankosky, M. A., Wijerathna, A., Olfert, O. O., Meers, S. B., & Evenden, M. L.  
352 (2018). Progress Toward Integrated Pest Management of Pea Leaf Weevil: A Review. *Annals of*  
353 *the Entomological Society of America*, 111(4), 144–153. <https://doi.org/10.1093/aesa/say007>



- 354 Cawoy, H., Mariutto, M., Henry, G., Fisher, C., Vasilyeva, N., Thonart, P., Dommes, J., & Ongena,  
355 M. (2014). Plant defense stimulation by natural isolates of bacillus depends on efficient surfactin  
356 production. *Molecular Plant-Microbe Interactions: MPMI*, 27(2), 87–100.  
357 <https://doi.org/10.1094/MPMI-09-13-0262-R>
- 358 Chisholm, P. J., Eigenbrode, S. D., Clark, R. E., Basu, S., & Crowder, D. W. (2019). Plant-mediated  
359 interactions between a vector and a non-vector herbivore promote the spread of a plant virus.  
360 *Proceedings of the Royal Society B: Biological Sciences*, 286(1911), 20191383.  
361 <https://doi.org/10.1098/rspb.2019.1383>
- 362 Chisholm, P. J., Sertsuvalkul, N., Casteel, C. L., & Crowder, D. W. (2018). Reciprocal plant-  
363 mediated interactions between a virus and a non-vector herbivore. *Ecology*, 99(10), 2139–2144.  
364 <https://doi.org/10.1002/ecy.2449>
- 365 Clement, S. L., Husebye, D. S., & Eigenbrode, S. D. (2010). Ecological Factors Influencing Pea  
366 Aphid Outbreaks in the US Pacific Northwest. In P. Kindlmann, A. F. G. Dixon, & J. P. Michaud  
367 (Eds.), *Aphid Biodiversity under Environmental Change: Patterns and Processes* (pp. 107–128).  
368 Springer Netherlands. [https://doi.org/10.1007/978-90-481-8601-3\\_7](https://doi.org/10.1007/978-90-481-8601-3_7)
- 369 de Vries, F. T., & Wallenstein, M. D. (2017). Below-ground connections underlying above-ground  
370 food production: A framework for optimising ecological connections in the rhizosphere. *Journal*  
371 *of Ecology*, 105(4), 913–920. <https://doi.org/10.1111/1365-2745.12783>
- 372 Dean, J. M., Mescher, M. C., & De Moraes, C. M. (2014). Plant Dependence on Rhizobia for  
373 Nitrogen Influences Induced Plant Defenses and Herbivore Performance. *International Journal of*  
374 *Molecular Sciences*, 15(1), 1466–1480. <https://doi.org/10.3390/ijms15011466>

- 375 Dumanović, J., Nepovimova, E., Natić, M., Kuća, K., & Jaćević, V. (2021) The significance of  
376 reactive oxygen species and antioxidant defense system in plants: A concise overview. *Frontiers*  
377 *in Plant Science*, 11, 552969. <http://doi.org/10.3389/fpls.2020.552969>
- 378 Fondevilla, S., Küster, H., Krajinski, F., Cubero, J. I., & Rubiales, D. (2011). Identification of genes  
379 differentially expressed in a resistant reaction to *Mycosphaerella pinodes* in pea using microarray  
380 technology. *BMC Genomics*, 12, 28. <https://doi.org/10.1186/1471-2164-12-28>
- 381 Fox, J., & S. Weisberg. (2011). *An R Companion to Applied Regression*. Sage Publications,  
382 Thousand Oaks, California, USA. <http://socserv.socsci.mcmaster>
- 383 Gaudio-Pedraza, R., Beck, M., Frances, L., Kirk, P., Ripodas, C., Niebel, A., Oldroyd, G. E. D.,  
384 Benitez-Alfonso, Y., & de Carvalho-Niebel, F. (2018). Callose-Regulated Symplastic  
385 Communication Coordinates Symbiotic Root Nodule Development. *Current Biology*, 28(22),  
386 3562-3577.e6. <https://doi.org/10.1016/j.cub.2018.09.031>
- 387 Godschalx, A. L., Tran, V., & Ballhorn, D. J. (2017). Host plant cyanotype determines degree of  
388 rhizobial symbiosis. *Ecosphere*, 8(9), e01929. <https://doi.org/10.1002/ecs2.1929>
- 389 Gopalakrishnan, S., Sathya, A., Vijayabharathi, R., Varshney, R. K., Gowda, C. L. L., &  
390 Krishnamurthy, L. (2015). Plant growth promoting rhizobia: Challenges and opportunities. 3  
391 *Biotech*, 5(4), 355–377. <https://doi.org/10.1007/s13205-014-0241-x>
- 392 He, Y., Fukushige, H., Hildebrand, D. F., & Gan, S. (2002). Evidence Supporting a Role of Jasmonic  
393 Acid in Arabidopsis Leaf Senescence. *Plant Physiology*, 128(3), 876–884.  
394 <https://doi.org/10.1104/pp.010843>
- 395 Heath, K. D., & Lau, J. A. (2011). Herbivores alter the fitness benefits of a plant–rhizobium  
396 mutualism. *Acta Oecologica*, 37(2), 87–92. <https://doi.org/10.1016/j.actao.2010.12.002>

397 Heinen, R., Biere, A., Harvey, J. A., & Bezemer, T. M. (2018). Effects of Soil Organisms on  
398 Aboveground Plant-Insect Interactions in the Field: Patterns, Mechanisms and the Role of  
399 Methodology. *Frontiers in Ecology and Evolution*, 6. <https://doi.org/10.3389/fevo.2018.00106>

400 Hooper, D. U., Chapin III, F. S., Ewel, J. J., Hector, A., Inchausti, P., Lavorel, S., Lawton, J. H.,  
401 Lodge, D. M., Loreau, M., Naeem, S., Schmid, B., Setälä, H., Symstad, A. J., Vandermeer, J., &  
402 Wardle, D. A. (2005). Effects of Biodiversity on Ecosystem Functioning: A Consensus of Current  
403 Knowledge. *Ecological Monographs*, 75(1), 3–35. <https://doi.org/10.1890/04-0922>

404 Jaber, L. R., & Vidal, S. (2009). Interactions between an endophytic fungus, aphids and extrafloral  
405 nectaries: Do endophytes induce extrafloral-mediated defences in *Vicia faba*? *Functional Ecology*,  
406 23(4), 707–714. <https://doi.org/10.1111/j.1365-2435.2009.01554.x>

407 Jha, Y., & Subramanian, R. B. (2013). Paddy plants inoculated with PGPR show better growth  
408 physiology and nutrient content under saline condition. *Chilean Journal of Agricultural Research*,  
409 73(3), 213–219. <https://doi.org/10.4067/S0718-58392013000300002>

410 Katayama, N., Silva, A. O., Kishida, O., Ushio, M., Kita, S., & Ohgushi, T. (2014). Herbivorous  
411 insect decreases plant nutrient uptake: The role of soil nutrient availability and association of  
412 below-ground symbionts. *Ecological Entomology*, 39(4), 511–518.  
413 <https://doi.org/10.1111/een.12125>

414 Kawahara, T., Namba, H., Toyoda, K., Kasai, T., Sugimoto, M., Inagaki, Y., ... & Shiraishi, T.  
415 (2006). Induction of defense responses in pea tissues by inorganic phosphate. *Journal of General*  
416 *Plant Pathology*, 72, 129–136. <http://doi.org/10.1007/s10327-005-0261-9>

417

- 418 Kempel, A., Brandl, R., & Schädler, M. (2009). Symbiotic Soil Microorganisms as Players in  
419 Aboveground Plant-Herbivore Interactions: The Role of Rhizobia. *Oikos*, 118(4), 634–640. DOI:  
420 <https://doi.org/10.1111/j.1600-0706.2009.17418.x>
- 421 Kempel, A., Schädler, M., Chrobock, T., Fischer, M., & van Kleunen, M. (2011). Tradeoffs  
422 associated with constitutive and induced plant resistance against herbivory. *Proceedings of the*  
423 *National Academy of Sciences of the United States of America*, 108(14), 5685–5689.  
424 <https://doi.org/10.1073/pnas.1016508108>
- 425 Kimura, M., & Kawano, T. (2015). Salicylic acid-induced superoxide generation catalyzed by plant  
426 peroxidase in hydrogen peroxide-independent manner. *Plant Signaling & Behavior*, 10.  
427 <http://doi.org/10.1080/15592324.2014.1000145>
- 428 Kozera, B., & Rapacz, M. (2013). Reference genes in real-time PCR. *Journal of Applied Genetics*,  
429 54(4), 391–406. <https://doi.org/10.1007/s13353-013-0173-x>
- 430 Kreplak, J., Madoui, M.A., Cápál, P., Novák, P., Labadie, K., Aubert, G., ... & Burstin, J. (2019).  
431 A reference genome for pea provides insight into legume genome evolution. *Nature Genetics*, 51,  
432 1411–1422. <http://doi.org/10.1038/s41588-019-0480-1>
- 433 Kulaeva, O.A., Zhernakov, A. I., Afonin, A.M., Boikov, S.S., Sulima, A.S., Tikhonovich, I.A., &  
434 Zhukov, V.A. (2017). Pea Marker Database (PMD) – A new online database combining known  
435 pea (*Pisum sativum* L.) gene-based markers. *PLOS ONE*, 12, e0186713.  
436 <http://doi.org/10.1371/journal.pone.0186713>
- 437 Lenth, R. V. (2016). Least-squares means: the R package lsmeans. *Journal of Statistical Software*,  
438 69, 1–33. <https://doi.org/10.18637/jss.v069.i01>
- 439

- 440 Livak, K. J., & Schmittgen, T. D. (2001). Analysis of relative gene expression data using real-time  
441 quantitative PCR and the 2(-Delta Delta C(T)) Method. *Methods (San Diego, Calif.)*, 25(4), 402–  
442 408. <https://doi.org/10.1006/meth.2001.1262>
- 443 Mabrouk, Y., Hemissi, I., Salem, I. B., Mejri, S., Saidi, M., & Belhadj, O. (2018). Potential of  
444 Rhizobia in Improving Nitrogen Fixation and Yields of Legumes. *Symbiosis*.  
445 <https://doi.org/10.5772/intechopen.73495>
- 446 Millet, Y. A., Danna, C. H., Clay, N. K., Songnuan, W., Simon, M. D., Werck-Reichhart, D., &  
447 Ausubel, F. M. (2010). Innate Immune Responses Activated in Arabidopsis Roots by Microbe-  
448 Associated Molecular Patterns. *The Plant Cell*, 22(3), 973–990.  
449 <https://doi.org/10.1105/tpc.109.069658>
- 450 Moravčíková, J., Margetínyová, D., Gálová, Z., Žur, I., Gregorová, Z., Zimová, M., Boszorádová,  
451 E., & Matušíková, I. (2016). Beta-1,3-Glucanase Activities in Wheat and Relative Species. *Nova*  
452 *Biotechnologica et Chimica*, 15(2), 122–132. <https://doi.org/10.1515/nbec-2016-0013>
- 453 Mutch, L. A., & Young, J. P. W. (2004). Diversity and specificity of *Rhizobium leguminosarum*  
454 biovar *viciae* on wild and cultivated legumes. *Molecular Ecology*, 13(8), 2435–2444.  
455 <https://doi.org/10.1111/j.1365-294X.2004.02259.x>
- 456 Ochieno, D. M. W., Karoney, E. M., Muge, E. K., Nyaboga, E. N., Baraza, D. L., Shibairo, S. I., &  
457 Naluyange, V. (2021). *Rhizobium*-Linked Nutritional and Phytochemical Changes Under  
458 Multitrophic Functional Contexts in Sustainable Food Systems. *Frontiers in Sustainable Food*  
459 *Systems*, 4, 283. <https://doi.org/10.3389/fsufs.2020.604396>
- 460 Pangesti, N., Pineda, A., Pieterse, C. M. J., Dicke, M., & Van Loon, J. J. A. (2013). Two-way plant  
461 mediated interactions between root-associated microbes and insects: From ecology to  
462 mechanisms. *Frontiers in Plant Science*, 4. <https://doi.org/10.3389/fpls.2013.00414>

463 Pangesti, N., Reichelt, M., van de Mortel, J. E., Kapsomenou, E., Gershenzon, J., van Loon, J. J. A.,  
464 Dicke, M., & Pineda, A. (2016). Jasmonic Acid and Ethylene Signaling Pathways Regulate  
465 Glucosinolate Levels in Plants During Rhizobacteria-Induced Systemic Resistance Against a Leaf-  
466 Chewing Herbivore. *Journal of Chemical Ecology*, 42(12), 1212–1225.  
467 <https://doi.org/10.1007/s10886-016-0787-7>

468 Pangesti, N., Weldegergis, B. T., Langendorf, B., van Loon, J. J. A., Dicke, M., & Pineda, A. (2015).  
469 Rhizobacterial colonization of roots modulates plant volatile emission and enhances the attraction  
470 of a parasitoid wasp to host-infested plants. *Oecologia*, 178(4), 1169–1180.  
471 <https://doi.org/10.1007/s00442-015-3277-7>

472 Patton, M. F., Bak, A., Sayre, J. M., Heck, M. L., & Casteel, C. L. (2020). A polerovirus, Potato  
473 leafroll virus, alters plant–vector interactions using three viral proteins. *Plant, Cell & Environment*,  
474 43(2), 387–399. <https://doi.org/10.1111/pce.13684>

475 Pineda, A., Soler, R., Pozo, M. J., Rasmann, S., & Turlings, T. C. J. (2015). Editorial: Above-  
476 belowground interactions involving plants, microbes and insects. *Frontiers in Plant Science*, 6,  
477 318. <https://doi.org/10.3389/fpls.2015.00318>

478 Pineda, A., Zheng, S.-J., van Loon, J. J. A., Pieterse, C. M. J., & Dicke, M. (2010). Helping plants  
479 to deal with insects: The role of beneficial soil-borne microbes. *Trends in Plant Science*, 15(9),  
480 507–514. <https://doi.org/10.1016/j.tplants.2010.05.007>

481 Ramirez, K. S., Knight, C. G., de Hollander, M., Brearley, F. Q., Constantinides, B., Cotton, A.,  
482 Creer, S., Crowther, T. W., Davison, J., Delgado-Baquerizo, M., Dorrepaal, E., Elliott, D. R., Fox,  
483 G., Griffiths, R. I., Hale, C., Hartman, K., Houlden, A., Jones, D. L., Krab, E. J., ... de Vries, F.  
484 T. (2018). Detecting macroecological patterns in bacterial communities across independent studies  
485 of global soils. *Nature Microbiology*, 3(2), 189–196. <https://doi.org/10.1038/s41564-017-0062-x>

- 486 Rashid, M. H.-O., Khan, A., Hossain, M. T., & Chung, Y. R. (2017). Induction of Systemic  
487 Resistance against Aphids by Endophytic *Bacillus velezensis* YC7010 via Expressing  
488 PHYTOALEXIN DEFICIENT4 in Arabidopsis. *Frontiers in Plant Science*, 8, 211.  
489 <https://doi.org/10.3389/fpls.2017.00211>
- 490 Rashid, Md. H.-O., & Chung, Y. R. (2017). Induction of Systemic Resistance against Insect  
491 Herbivores in Plants by Beneficial Soil Microbes. *Frontiers in Plant Science*, 8.  
492 <https://doi.org/10.3389/fpls.2017.01816>
- 493 Rasmann, S., Bennett, A., Biere, A., Karley, A., & Guerrieri, E. (2017). Root symbionts: Powerful  
494 drivers of plant above- and belowground indirect defenses. *Insect Science*, 24(6), 947–960.  
495 <https://doi.org/10.1111/1744-7917.12464>
- 496 Romera, F. J., García, M. J., Lucena, C., Martínez-Medina, A., Aparicio, M. A., Ramos, J.,  
497 Alcántara, E., Angulo, M., & Pérez-Vicente, R. (2019). Induced Systemic Resistance (ISR) and  
498 Fe Deficiency Responses in Dicot Plants. *Frontiers in Plant Science*, 10, 287.  
499 <https://doi.org/10.3389/fpls.2019.00287>
- 500 Roy Choudhury, S., Johns, S. M., & Pandey, S. (2019). A convenient, soil-free method for the  
501 production of root nodules in soybean to study the effects of exogenous additives. *Plant Direct*,  
502 3(4), e00135. <https://doi.org/10.1002/pld3.135>
- 503 Santos, F., Peñaflo, M. F. G. V., Paré, P. W., Sanches, P. A., Kamiya, A. C., Tonelli, M., Nardi, C.,  
504 & Bento, J. M. S. (2014). A Novel Interaction between Plant-Beneficial Rhizobacteria and Roots:  
505 Colonization Induces Corn Resistance against the Root Herbivore *Diabrotica speciosa*. *PLOS*  
506 *ONE*, 9(11), e113280. <https://doi.org/10.1371/journal.pone.0113280>
- 507 Seguel, A., Jelenska, J., Herrera-Vásquez, A., Marr, S. K., Joyce, M. B., Gagesch, K. R., Shakoor,  
508 N., Jiang, S.-C., Fonseca, A., Wildermuth, M. C., Greenberg, J. T., & Holuigue, L. (2018).

509 PROHIBITIN3 Forms Complexes with ISOCHORISMATE SYNTHASE1 to Regulate Stress-  
510 Induced Salicylic Acid Biosynthesis in Arabidopsis. *Plant Physiology*, 176(3), 2515–2531.  
511 <https://doi.org/10.1104/pp.17.00941>

512 Sgroj, V., Cassán, F., Masciarelli, O., Del Papa, M. F., Lagares, A., & Luna, V. (2009). Isolation  
513 and characterization of endophytic plant growth-promoting (PGPB) or stress homeostasis-  
514 regulating (PSHB) bacteria associated to the halophyte *Prosopis strombulifera*. *Applied*  
515 *Microbiology and Biotechnology*, 85(2), 371–381. <https://doi.org/10.1007/s00253-009-2116-3>

516 Shikano, I., Rosa, C., Tan, C.-W., & Felton, G. W. (2017). Tritrophic Interactions: Microbe-  
517 Mediated Plant Effects on Insect Herbivores. *Annual Review of Phytopathology*, 55(1), 313–331.  
518 <https://doi.org/10.1146/annurev-phyto-080516-035319>

519 Simonsen, A. K., & Stinchcombe, J. R. (2014). Herbivory eliminates fitness costs of mutualism  
520 exploiters. *The New Phytologist*, 202(2), 651–661. <https://doi.org/10.1111/nph.12668>

521 Soundararajan, R. P., Chitra, N., & Geetha, S. (2013). Host plant resistance to insect pests of grain  
522 legumes -A review. *Agricultural Reviews*, 34(3), 176. [https://doi.org/10.5958/j.0976-](https://doi.org/10.5958/j.0976-0741.34.3.002)  
523 [0741.34.3.002](https://doi.org/10.5958/j.0976-0741.34.3.002)

524 Srivastava, V. K., Tuteja, R., & Tuteja, N. (2015). Calcium-energized motor protein forisome  
525 controls damage in phloem: Potential applications as biomimetic “smart” material. *Critical*  
526 *Reviews in Biotechnology*, 35(2), 173–183. <https://doi.org/10.3109/07388551.2013.823598>

527 Tao, L., Hunter, M. D., & de Roode, J. C. (2017). Microbial Root Mutualists Affect the Predators  
528 and Pathogens of Herbivores above Ground: Mechanisms, Magnitudes, and Missing Links.  
529 *Frontiers in Ecology and Evolution*, 5. <https://doi.org/10.3389/fevo.2017.00160>



- 530 Thamer, S., Schädler, M., Bonte, D., & Ballhorn, D. J. (2011). Dual benefit from a belowground  
531 symbiosis: Nitrogen fixing rhizobia promote growth and defense against a specialist herbivore in  
532 a cyanogenic plant. *Plant and Soil*, 341(1), 209–219. <https://doi.org/10.1007/s11104-010-0635-4>
- 533 Tominaga, A., Nagata, M., Futsuki, K., Abe, H., Uchiumi, T., Abe, M., Kucho, K., Hashiguchi, M.,  
534 Akashi, R., Hirsch, A., Arima, S., & Suzuki, A. (2010). Effect of abscisic acid on symbiotic  
535 nitrogen fixation activity in the root nodules of *Lotus japonicus*. *Plant Signaling & Behavior*, 5(4),  
536 440–443. <https://doi.org/10.4161/psb.5.4.10849>
- 537 Tran, H. S., You, M. P., & Barbetti, M. J. (2018). Expression of defence-related genes in stems and  
538 leaves of resistant and susceptible field pea (*Pisum sativum*) during infection by *Phoma koolunga*.  
539 *Plant Pathology*, 67(1), 156–166. <https://doi.org/10.1111/ppa.12709>
- 540 Valencia, E., Gross, N., Quero, J. L., Carmona, C. P., Ochoa, V., Gozalo, B., Delgado-Baquerizo,  
541 M., Dumack, K., Hamonts, K., Singh, B. K., Bonkowski, M., & Maestre, F. T. (2018). Cascading  
542 effects from plants to soil microorganisms explain how plant species richness and simulated  
543 climate change affect soil multifunctionality. *Global Change Biology*, 24(12), 5642–5654.  
544 <https://doi.org/10.1111/gcb.14440>
- 545 Van Geem, M., Gols, R., Van Dam, N. M., Van Der Putten, W. H., Fortuna, T., & Harvey, J. A.  
546 (2013). The importance of aboveground-belowground interactions on the evolution and  
547 maintenance of variation in plant defence traits. *Frontiers in Plant Science* 4, 431.  
548 <http://doi.org/10.3389/fpls.2013.00431>
- 549 Walz, C., Juenger, M., Schad, M., & Kehr, J. (2002). Evidence for the presence and activity of a  
550 complete antioxidant defence system in mature sieve tubes. *The Plant Journal: For Cell and*  
551 *Molecular Biology*, 31(2), 189–197. <https://doi.org/10.1046/j.1365-313x.2002.01348.x>

552 Wasternack, C., & Hause, B. (2013). Jasmonates: Biosynthesis, perception, signal transduction and  
553 action in plant stress response, growth and development. An update to the 2007 review in *Annals*  
554 of Botany. *Annals of Botany*, 111(6), 1021–1058. <https://doi.org/10.1093/aob/mct067>

555 Yang, G., Liu, N., Lu, W., Wang, S., Kan, H., Zhang, Y., & Chen, Y. (2014). The interaction between  
556 arbuscular mycorrhizal fungi and soil phosphorus availability influences plant community  
557 productivity and ecosystem stability. *Journal of Ecology*, 102, 1072–1082.  
558 <https://doi.org/10.1111/1365-2745.12249>

559 Yergaliyev, T. M., Nurbekova, Z., Mukiyanova, G., Akbassova, A., Sutula, M., Zhangazin, S., Bari,  
560 A., Tleukulova, Z., Shamekova, M., Masalimov, Z. K., & Omarov, R. T. (2016). The involvement  
561 of ROS producing aldehyde oxidase in plant response to Tombusvirus infection. *Plant Physiology*  
562 and Biochemistry: PPB, 109, 36–44. <https://doi.org/10.1016/j.plaphy.2016.09.001>

563 Zavaliev, R., Ueki, S., Epel, B. L., & Citovsky, V. (2011). Biology of callose ( $\beta$ -1,3-glucan) turnover  
564 at plasmodesmata. *Protoplasma*, 248(1), 117–130. <https://doi.org/10.1007/s00709-010-0247-0>

565 Zhang, J., Du, X., Wang, Q., Chen, X., Lv, D., Xu, K., Qu, S., & Zhang, Z. (2010). Expression of  
566 pathogenesis related genes in response to salicylic acid, methyl jasmonate and 1-  
567 aminocyclopropane-1-carboxylic acid in *Malus hupehensis* (Pamp.) Rehd. *BMC Research Notes*,  
568 3, 208. <https://doi.org/10.1186/1756-0500-3-208>

569 Zhu, F., Heinen, R., van der Sluijs, M., Raaijmakers, C., Biere, A., & Bezemer, T. M. (2018).  
570 Species-specific plant–soil feedbacks alter herbivore-induced gene expression and defense  
571 chemistry in *Plantago lanceolata*. *Oecologia*, 188(3), 801–811. [https://doi.org/10.1007/s00442-](https://doi.org/10.1007/s00442-018-4245-9)  
572 [018-4245-9](https://doi.org/10.1007/s00442-018-4245-9)

573

574

575 **FIGURE LEGENDS**

576 **Figure 1.** Soil rhizobia confer resistance against *S. lineatus* feeding. (A) Reduced number of *S.*  
577 *lineatus* induced feeding notches were observed in pea leaves in presence of soil rhizobia (N = 10).  
578 Average number of feeding notches in response to soil treatments (Poisson GLM). Rhizobia  
579 addition reduced feeding notches, with intermediate levels of herbivory in control soils ( $p < .05$ ,  
580 Tukey HSD). (B) Effect of soil treatments on uptake of amino acids by *S. lineatus*. Log-  
581 transformed mean concentrations (nmol/mg DW) among 13 amino acids in weevils feeding on pea  
582 plants undergoing various soil treatments.

583 **Figure 2.** Effect of *S. lineatus* herbivory on nodulation: Fig 2A, B & C. Nodule count based on  
584 Poisson-fit GLM. Nodule wet and dry mass based on Gaussian-fit GLM. *S. lineatus* feeding  
585 negative affects nodule number and wet weight but not dry mass ( $p < 0.05$ , Tukey HSD).

586 **Figure 3.** Relative transcript accumulation of SA responsive genes: *ICS1* (A), *PR1* (B); ABA  
587 responsive gene: *AO3* (C); JA responsive genes: *OPR3* (D), *LOX2* (E); Ethylene responsive genes:  
588 *ACS2* (F) in *Pisum sativum* at 7dpi. Bars not connected with same number are significantly  
589 different.

590 **Figure 4.** Relative transcript accumulation of callose mediated defense genes: *Beta-1, 3 glucanase*  
591 (A), *PR1* (B) and *Calcium-regulated/ATP-independent ferisome protein gene* in *Pisum sativum*  
592 7dpi. Bars not connected with same number are significantly different.

593 **Figure 5.** Relative transcript accumulation of antioxidant related defense genes: *CuZnSOD* (A),  
594 *FeSOD* (B), *MnSOD*(C), *Catalase* (D), *GRI* (E) and Peroxidase, *PsOX11* (F) in *Pisum sativum* at  
595 7 dpi Bars not connected with same number are significantly different.

596

597

598 **FIGURE 1**

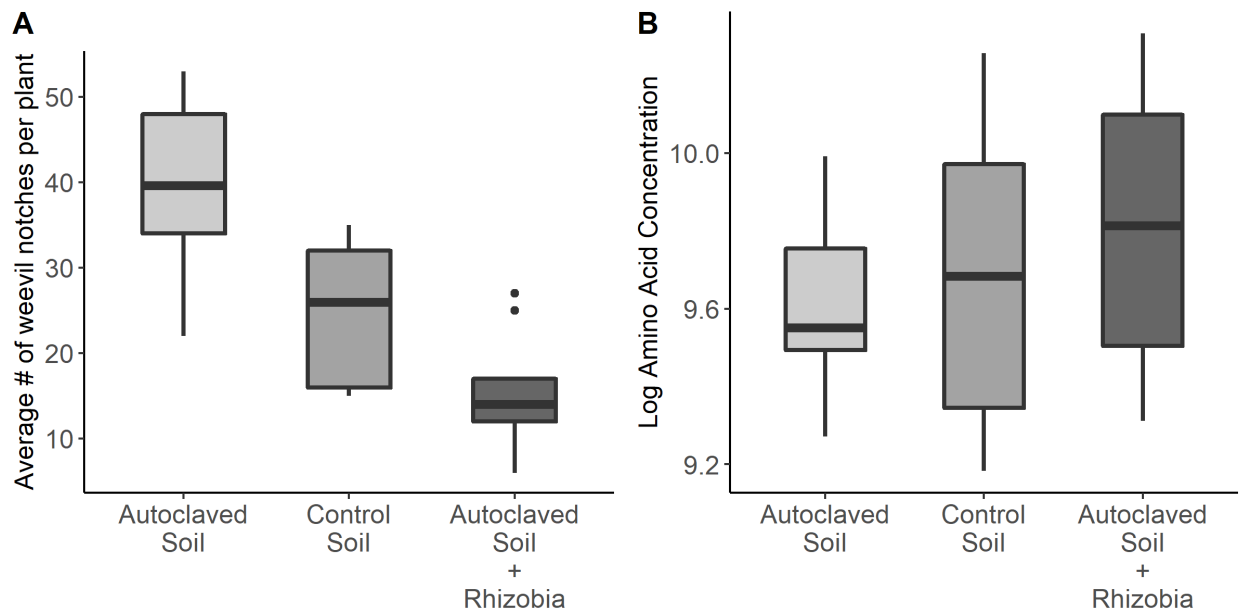

599

600

601

602

603

604

605

606

607

608

609

610

611

612

613

614 **FIGURE 2**

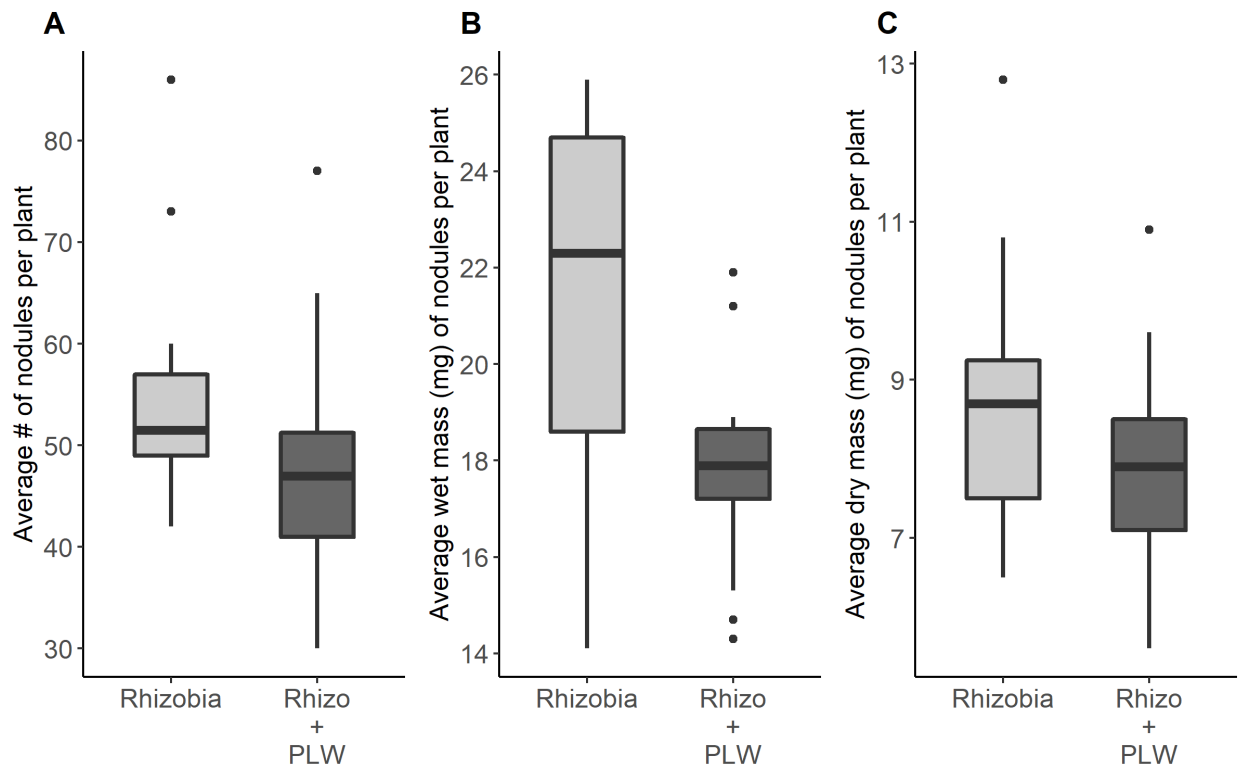

615

616

617 **FIGURE 3**

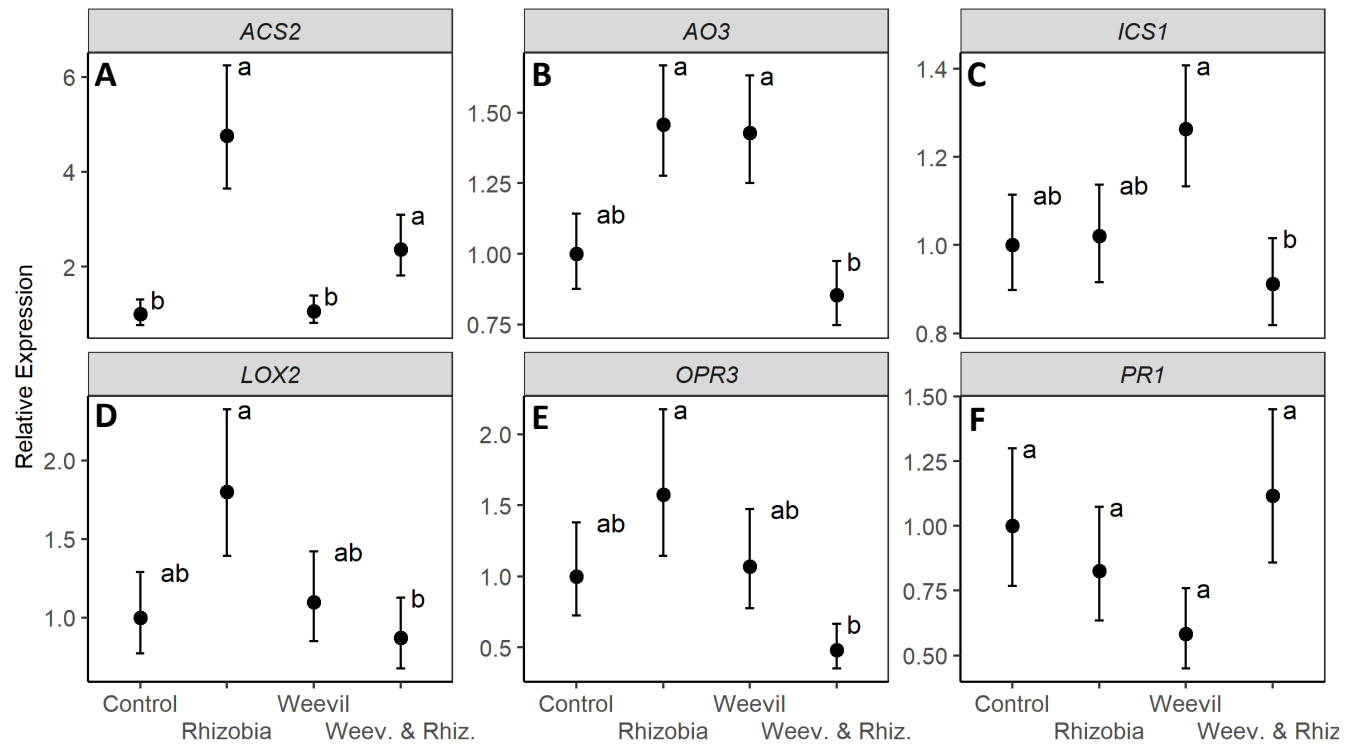

618

619 **FIGURE 4.**

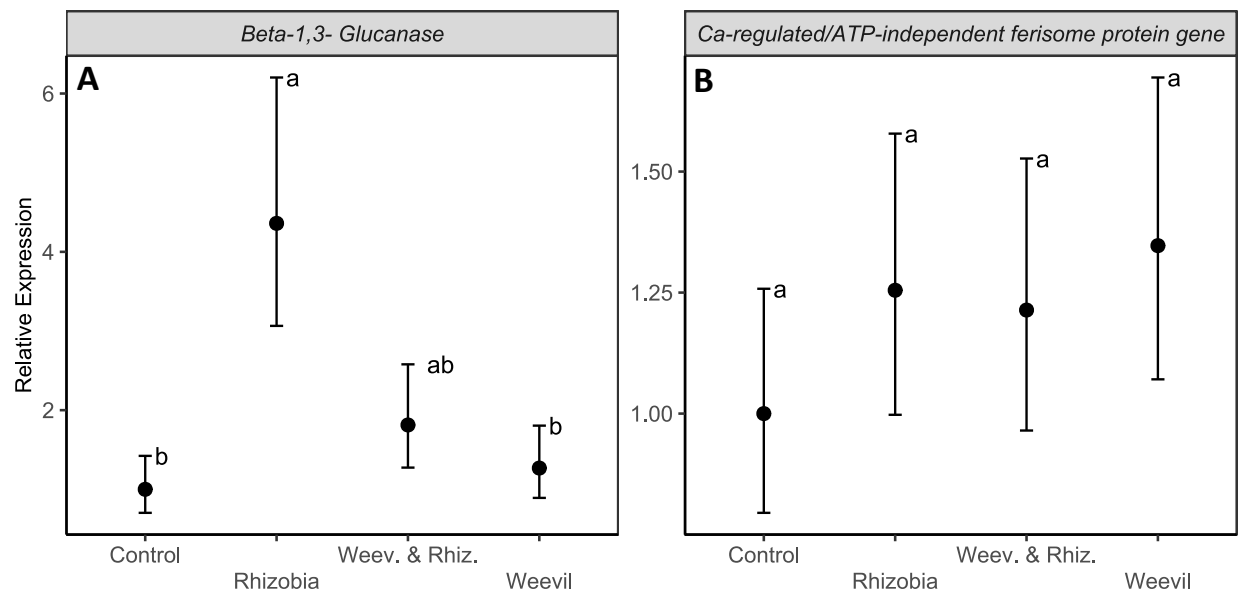

620

621 **FIGURE 5**

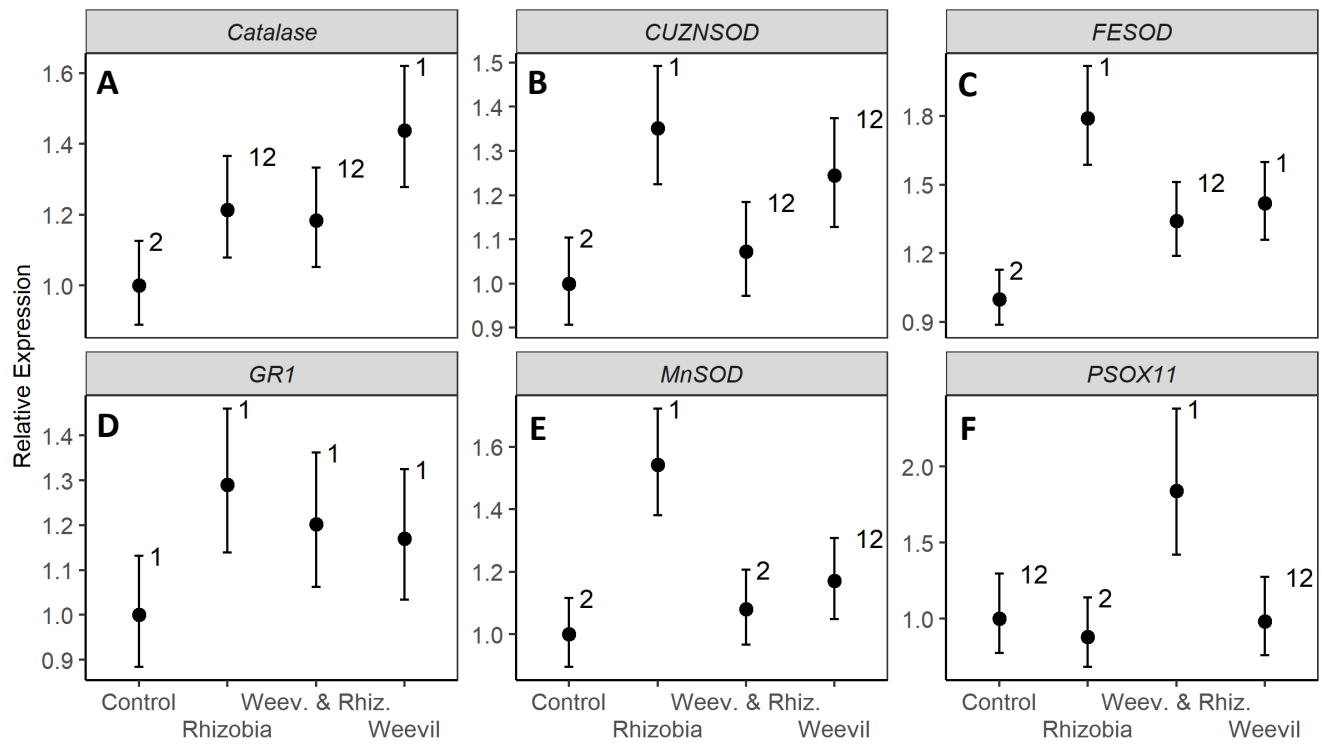

622

623
